# Supplementary material for: Phosphorylation of Large T Antigen Regulates Merkel Cell Polyomavirus Replication
Source: MDPI journal article supplement (doi:10.3390/cancers6031464), 2014-07-08
Supplement: s1 [file s1]

Supplementary Material

**Table S1.** Phosphorylated peptides Identified by mass spectrometry. Shown are the reconstructed peptides isolated by both the standard purification and titanium oxide enrichments after trypsin digest. Confidence in identification is given as a probability. The residues in bold are the ones identified as having a mass value 80 daltons higher than predicted, indicating a phosphorylation modification. Please fill data into the table format below?

| Peptide Purification | Peptide Sequence          | Probability | Amino Acid | Modification  |
|----------------------|---------------------------|-------------|------------|---------------|
| Standard             | (R)SSASSASSASFTSTPPKPK(K) | 95%         | Thr 297    | Phospho (+80) |
|                      | (R)SSSFTTPKTPPPFSR(K)     | 95%         | Thr 271    | Phospho (+80) |
|                      | (R)SSSFTTPKTPPPFSR(K)     | 95%         | Thr 271    | Phospho (+80) |
| Titanium Oxide       | (R)SSASSASSASFTSTPPKPK(K) | 95%         | Thr 299    | Phospho (+80) |
|                      | (R)SSASSASSASFTSTPPKPK(K) | 95%         | Thr 299    | Phospho (+80) |
|                      | (R)SSSFTTPKTPPPFSR(K)     | 95%         | Thr 271    | Phospho (+80) |
|                      | (R)SSSFTTPKTPPPFSR(K)     | 95%         | Thr 271    | Phospho (+80) |
|                      | (R)SSSFTTPKTPPPFSR(K)     | 95%         | Thr 271    | Phospho (+80) |

**Figure S1.** MCPyV phospho-mutant LT proteins recruit cellular factors to the same degree. Replication foci scored in Figure 3 A-C were assessed for colocalization of the indicated cellular factors. Bar indicates standard deviation from the mean from three independent experiments. A one-way ANOVA was performed to determine significance (\*\*  $p < 0.001$ ).

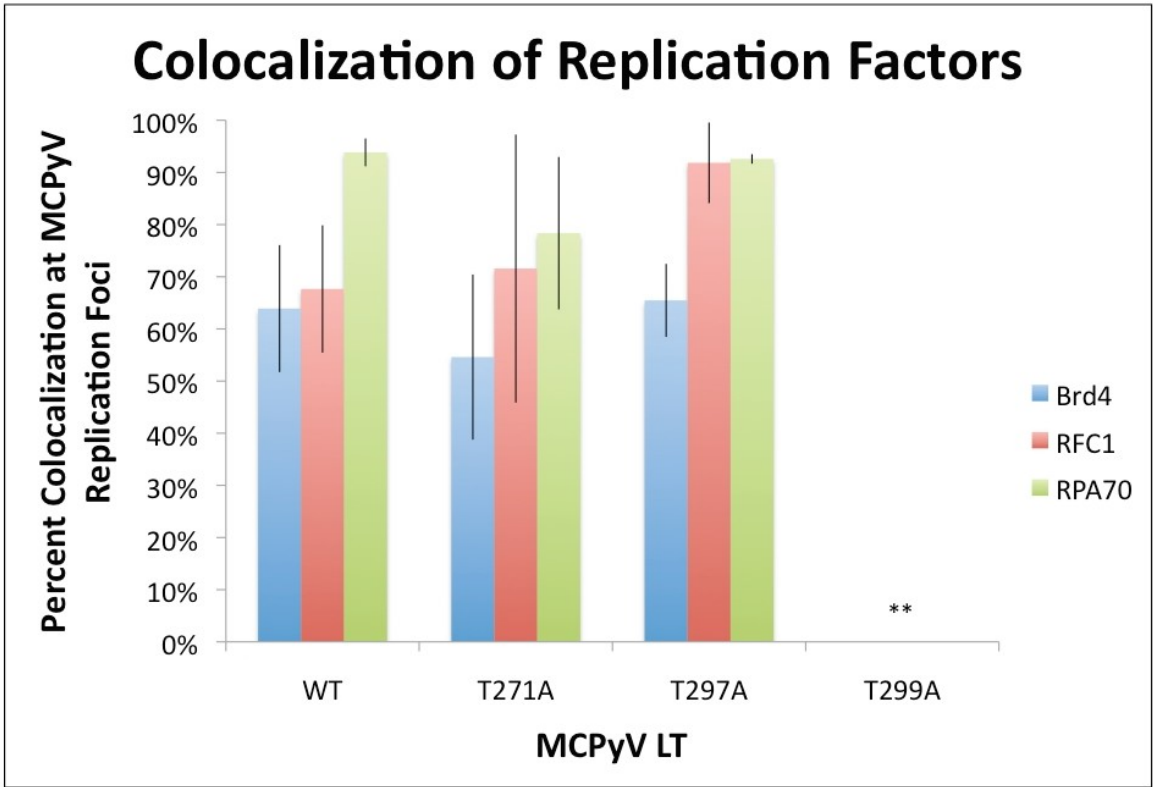

**Figure S2.** Unwinding assay performed with a helicase mutant LT and a mutated Ori probe. Unwinding assays were performed with both wild-type LT and the E627A mutation, which abolishes helicase activity. In parallel, an origin probe with a mutation in the seventh pentanucleotide repeat which abolishes origin-dependent replication (Ori350) was also tested using wild-type MCPyV LT. Data shown are representative of two repeats.

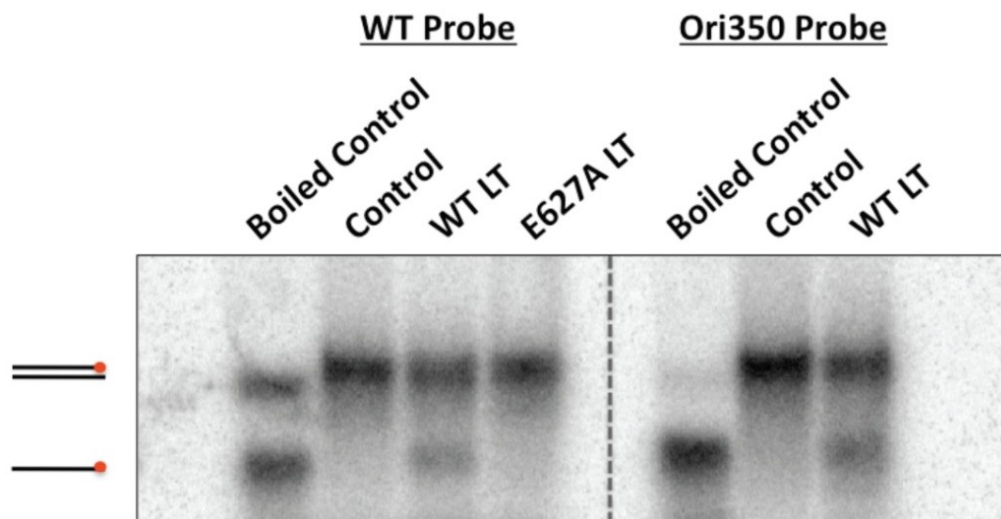

© 2014 by the authors; licensee MDPI, Basel, Switzerland. This article is an open access article distributed under the terms and conditions of the Creative Commons Attribution license (<http://creativecommons.org/licenses/by/3.0/>).
